# Supplementary material for: Maturity-Related Variations in Morphology, Body Composition, and Somatotype Features among Young Male Football Players
Source: MDPI journal article supplement (doi:10.3390/children10040721), 2023-04-13
Supplement: s1 [file s1]

## Supplementary Material

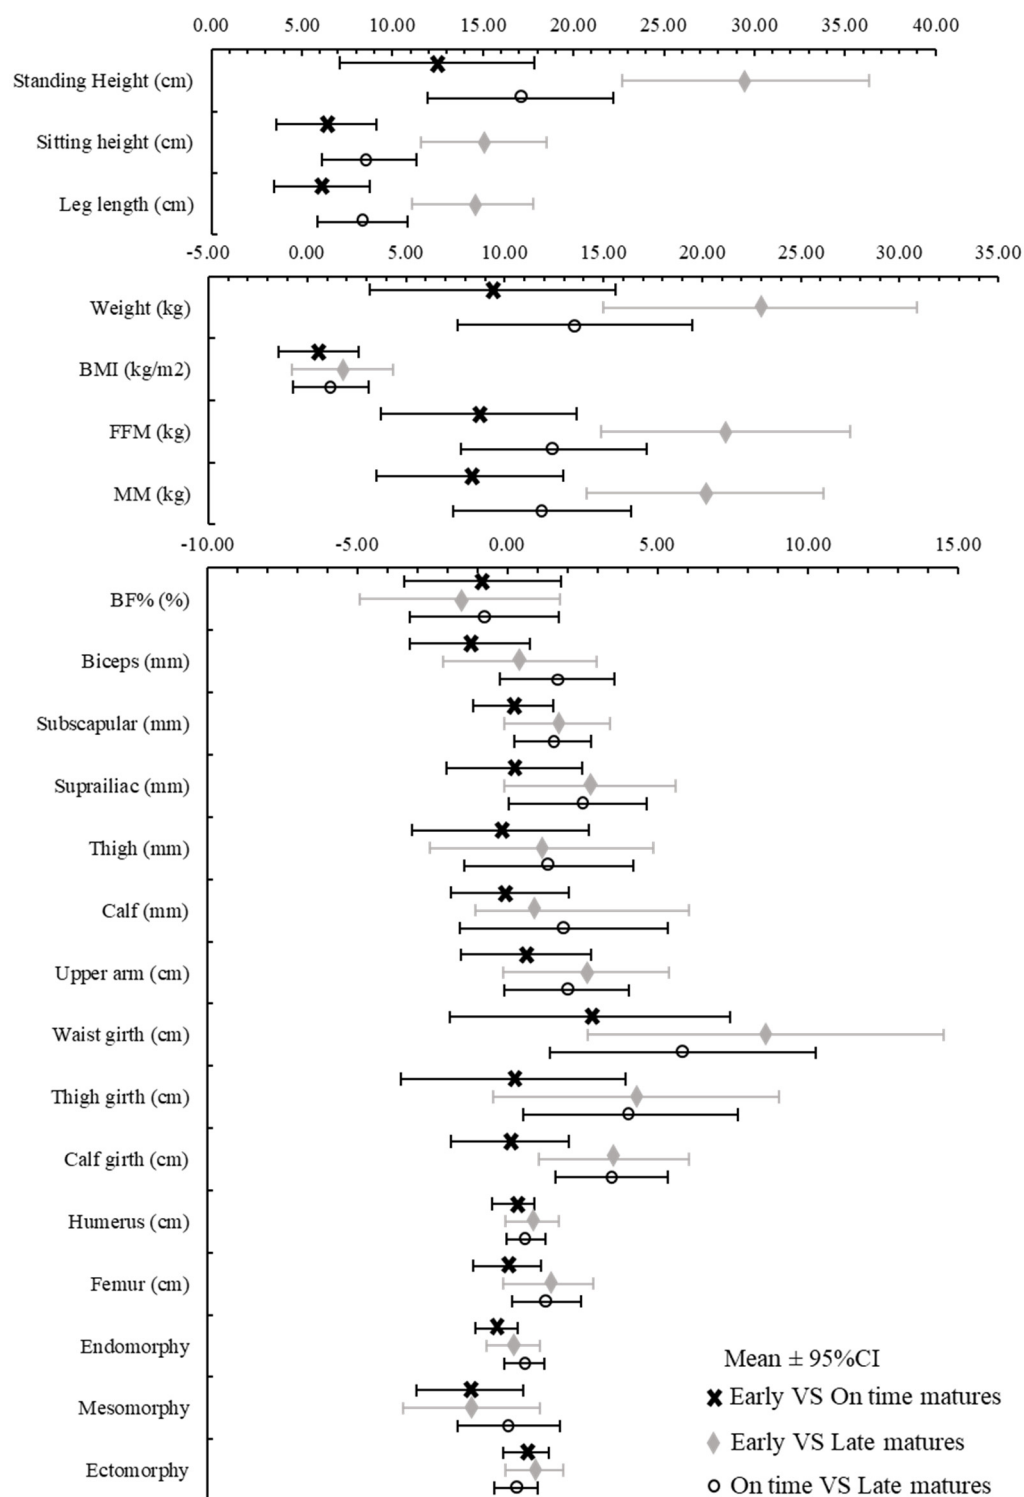

**Figure S1.** Mean differences and 95% confidence intervals between early (n = 8), on-time (n = 47), and late (n = 9) maturers for height, body composition, skinfolds, girths, breadths, and somatotype characteristics in U15 elite football players.

**Table S1.** Pearson r correlations between chronological age and body composition (BC) features in U15 football players (n = 64).

| Age | Standing Height (cm) | Sitting Height (cm) | Leg Length (cm) | Weight (kg) | BMI (kg/m <sup>2</sup> ) | FFM (kg) | MM (kg)  | BF% (%)   |
|-----|----------------------|---------------------|-----------------|-------------|--------------------------|----------|----------|-----------|
| 1   | 0.488 **             | 0.487 **            | 0.486 **        | 0.381 **    | 0.008                    | 0.466 ** | 0.465 ** | −0.415 ** |
